# Supplementary material
Source: publisher site journal article supplement (https://www.dovepress.com/article/457469)
Supplement: Supplementary file 1 [file get_supplementary_file.php]

**Tables**

**Table S1** Summary of Gene Expression Omnibus dataset information

|  | GSE20680 | GSE20681 |
| --- | --- | --- |
| Organism | *Homo sapiens* | *Homo sapiens* |
| Tissue | Whole Blood | Whole Blood |
| Experiment type | Expression profiling by array | Expression profiling by array |
| Platforms | GPL4133 | GPL4133 |
| Sample (number) |  |  |
| Control | 52 | 99 |
| CHD | 87 | 99 |
| Total | 139 | 198 |

**Abbreviations:** CHD, coronary heart disease.

**Table S2** Necroptosis gene set

| Description | Gene Symbol |
| --- | --- |
| Receptor-Interacting Protein Kinase 1 | *RIPK1* |
| Receptor-Interacting Protein Kinase 3 | *RIPK3* |
| Mixed Lineage Kinase Domain Like Pseudokinase | *MLKL* |
| Toll Like Receptor 2 | *TLR2* |
| Toll Like Receptor 3 | *TLR3* |
| Toll Like Receptor 4 | *TLR4* |
| TNF Receptor Superfamily Member 1A | *TNFRSF1A* |
| PGAM Family Member 5, Mitochondrial Serine | *PGAM5* |
| Z-DNA Binding Protein 1 | *ZBP1* |
| Nuclear Receptor Subfamily 2 Group C Member 2 | *NR2C2* |
| High Mobility Group Box 1 | *HMGB1* |
| Ubiquitin Specific Peptidase 22 | *USP22* |
| TNF Receptor Associated Factor 2 | *TRAF2* |
| Aldehyde Dehydrogenase 2 Family Member | *ALDH2* |
| Enhancer Of Zeste 2 Polycomb Repressive Complex 2 Subunit | *EZH2* |
| NDRG Family Member 2 | *NDRG2* |
| C-X-C Motif Chemokine Ligand 1 | *CXCL1* |

**Table S3** Primer list

| Gene | Primer |
| --- | --- |
| *MLKL* forward | TTTCTAACAGCAAGCCAGGACA |
| reverse | CTCCTTGGCTTATGGGTGAAA |
| *TLR3*  forward | GAGTTTTCTCCAGGGTGTTTTCA |
| reverse | AAGTTGTATTGCTGGTGGTGGA |
| *HMGB1 forward* | *CAAACTTGTCGGGAGGAGCATA* |
| reverse | TTGGGCGATACTCAGAGCAGAA |
| *NDRG2 forward* | CAAGGGTTGGATGGATTGG |
| reverse | AGGTCTCGGCGGTTGTTGTA |
| *GAPDH forward* | GGAAGCTTGTCATCAATGGAAATC |
| reverse | TGATGACCCTTTTGGCTCCC |

**Table S4** Results of Gene Ontology enrichment analysis

| Ontology | ID | Description | Gene Ratio | p. adjust |
| --- | --- | --- | --- | --- |
| BP | GO:0003012 | muscle system process | 32/650 | 0.0214 |
| BP | GO:0034765 | regulation of ion transmembrane transport | 31/650 | 0.0471 |
| BP | GO:0006936 | muscle contraction | 29/650 | 0.0060 |
| BP | GO:0006874 | cellular calcium ion homeostasis | 31/650 | 0.0290 |
| BP | GO:0008016 | regulation of heart contraction | 22/650 | 0.0109 |
| CC | GO:0062023 | collagen-containing extracellular matrix | 30/680 | 0.0066 |
| CC | GO:0005911 | cell-cell junction | 29/680 | 0.02700 |
| CC | GO:0034702 | ion channel complex | 21/680 | 0.0340 |
| CC | GO:0030016 | myofibril | 17/680 | 0.0340 |
| CC | GO:0043292 | contractile fiber | 17/680 | 0.0472 |
| MF | GO:0015267 | channel activity | 32/649 | 0.01935 |
| MF | GO:0022803 | passive transmembrane transporter activity | 32/649 | 0.01935 |
| MF | GO:0005216 | ion channel activity | 29/649 | 0.0316 |
| MF | GO:0022839 | ion gated channel activity | 25/649 | 0.0278 |
| MF | GO:0005201 | extracellular matrix structural constituent | 19/649 | 0.0043 |
| KEGG | hsa04080 | Neuroactive ligand-receptor interaction | 38/287 | 5.95e-08 |
| KEGG | hsa04020 | Calcium signaling pathway | 19/287 | 0.0120 |

**Abbreviations:** BP, biological process; CC, cellular component; MF, molecular function; KEGG, Kyoto Encyclopedia of Genes.

**Table S5** Results of Gene Set Enrichment Analysis

| Description | NES | p. adjust |
| --- | --- | --- |
| VOLTAGE_GATED_POTASSIUM_CHANNELS | -1.72849 | 0.09461 |
| ECM_RECEPTOR_INTERACTION | -1.630244 | 0.107833 |
| CALCIUM_SIGNALING_PATHWAY | -1.52592 | 0.107833 |
| MHC_PATHWAY | 1.945495 | 0.1078332 |
| IL6_SIGNALING_PATHWAY | 1.9175171 | 0.1078332 |

**Abbreviation:** NES, normalized enrichment score.

**Table S6** Common clinical features of coronary heart disease and controls

| Characteristic | Control(n=50) | CHD(n=52) | p value |
| --- | --- | --- | --- |
| Age, (years) | 59.9±9.2 | 59.5±10.8 | 0.079 |
| Female, n (%) | 26(52.0%) | 18(34.6%) | 0.075 |
| Hypertension, n (%) | 21(42.0%) | 28 (53.8%) | 0.231 |
| Diabetes, n (%) | 7(14.0%) | 13(25.0%) | 0.214 |
| Smoking history, n (%) | 20(40.0%) | 28(53.8%) | 0.161 |
| TG | 1.65(1.11,2.19) | 1.57(1.20,1.99) | 0.685 |
| TC | 4.27(3.62,4.99) | 4.32(3.74,4.62) | 0.618 |
| LDL | 2.45±0.71 | 2.57±0.84 | 0.483 |
| HDL | 1.17±0.33 | 1.06±0.24 | 0.640 |
| LPa | 66(30.5，138.5) | 122(56，242) | 0.010 * |
| Glu | 5.20(4.79,5.83) | 5.55(4.91,6.72) | 0.150 |

**Notes:** *, *p* < 0.05

**Abbreviations:** CHD, coronary heart disease; TG, Triglycerides; TC, Total cholesterol; LDL, Low-density lipoprotein; HDL, High-density lipoprotein; LPa, Lipoprotein a; Glu, Glucose.
